# Supplementary material for: Amino Acid Mutations A286V and T437M in the Nucleoprotein Attenuate H7N9 Viruses in Mice
Source: PubMed Central journal article supplement (PMC6955278; doi:10.1128/jvi.01530-19), 2020-01-06
Supplement: JVI.01530-19-s0001.pdf [file JVI.01530-19-s0001.pdf]

**Table S1.** Amino acids at positions 286 and 437 of NP of 58,747 influenza viruses.

| Amino acid at position 286 of NP | Strain numbers | Amino acid at position 437 of NP | Strain numbers |
|----------------------------------|----------------|----------------------------------|----------------|
| A                                | 41193          | T                                | 58658          |
| S                                | 17215          | I                                | 56             |
| T                                | 200            | S                                | 13             |
| V                                | 107            | A                                | 9              |
| G                                | 23             | N                                | 7              |
| L                                | 4              | M                                | 2              |
| P                                | 3              | R                                | 1              |
| D                                | 1              | V                                | 1              |
| I                                | 1              | /                                | /              |

**TABLE S2.** Primers used for pBD cDNA construction and for introducing mutations into the NP gene of the mutant viruses.

| Purpose                    | Primer(s) (5'–3') <sup>a</sup>                      |                                                      |
|----------------------------|-----------------------------------------------------|------------------------------------------------------|
|                            | Forward                                             | Reverse                                              |
| PB2 amplification          | TGCCGGCCAGCAAAAGCAGGTCAAATATATTC                    | CGGGTTATTAGTAGAAACAAGGTCGTTTTTAAACAATTC              |
| PB1 amplification          | TGCCGGCCAGCAAAAGCAGGCAAACCATTTG                     | CGGGTTATTAGTAGAAACAAGGCATTTTTTCATG                   |
| PA amplification           | TGCCGGCCAGCGAAAGCAGGTATTGATCC                       | CGGGTTATTAGTAGAAACAAGGTACTTTTTTTGG                   |
| HA amplification           | TGCCGGCCAGCAAAAGCAGGGGATAC                          | CGGGTTATTAGTAGAAACAAGGGTG                            |
| NP amplification           | TGCCGGCCAGCAAAAGCAGGGTAGATAATCACTCA                 | CGGGTTATTAGTAGAAACAAGGGTATTTTTTC                     |
| NA amplification           | TGCCGGCCAGCAAAAGCAGGGTCGAG                          | CGGGTTATTAGTAGAAACAAGGGTC                            |
| M amplification            | TGCCGGCCAGCAAAAGCAGGTAGATGTTTAAAG                   | CGGGTTATTAGTAGAAACAAGGTAGTTTTTTTAC                   |
| NS amplification           | TGCCGGCCAGCAAAAGCAGGGTGACAAAGAC                     | CGGGTTATTAGTAGAAACAAGGGTGTTTTTTTATC                  |
| CK/S1220-NP-A286V          | <b><u>T</u></b> TAGTGGATATGACTTTGAGAGAGAAGGGTACTCC  | CAAAGTCATATCCACTA <b><u>A</u></b> CCACTGCAAGTCCGTAC  |
| CK/S1220-NP-T437M          | TAGAA <b><u>T</u></b> GTCTGACATGAGGACTGAAATCATAAGAA | CTCATGTCAGAC <b><u>A</u></b> TTCTACCCTCATTATTTTCCTGT |
| CK/SD008-PB2/627K-NP-A286V | <b><u>T</u></b> TAGTGGATATGACTTTGAGAGAGAAGGGTACTCC  | CAAAGTCATATCCACTA <b><u>A</u></b> CCACTGCAAGCCCCTAC  |
| CK/SD008-PB2/627K-NP-T437M | TAGAA <b><u>T</u></b> GTCTGACATGAGGACTGAAATCATAAGAA | CTCATGTCAGAC <b><u>A</u></b> TTCTACCCTCATTATTTTCCTGT |

<sup>a</sup> The nucleotides that have been changed are underlined and in boldface type.
